# Supplementary material for: Whistler waves produced by monochromatic currents in the low nighttime ionosphere
Source: Copernicus journal article supplement (doi:10.5194/angeo-2020-51), 2020-08-26
Supplement: Supplementary file [file angeo-2020-51-RC2-supplement.pdf]

1. The author should clarify the motivation for this research. As has been mentioned in the second paragraph of the Introduction of this paper, “several numerical methods have been developed for calculating of whistler wave fields in the Earth’s ionosphere”. Then, is there any specific reason why the author chose to adopt the technique known as the two-point boundary-value problem? For example, does this technique provide more stable numerical results compared to the previously mentioned techniques? Or is this technique more efficient than other techniques?

2. Page 5, Line 10-11: “... the collision frequencies between charged and neutral particles shown in Fig.1b. The data are taken from International Reference Ionosphere...”. How are these collision frequencies obtained from IRI model? Are they calculated with some equations or from some empirical models? The related reference should be given.

3. Some typos should be corrected, for example:

Page 4 Line 3: “... Matlab’s bvp4c...”

Page 9 Line 1: “...  $J_{max} \sim 10^{-6} \div 10^{-5} Am^{-1}$  “;

Page 9 Line 5: “ ...  $\sim 3,2nWm^{-1}$  “

4. Some wording and expression need to be reconsidered? For example:

Page 1 Line 20: “... still very actual”

Page 5 Line 14-15: “... scale of plasma inhomogeneity exceeds 70km and is much more than...”

Page 8 Line 14-15: “We mention that the used in our calculation current distributions...”

Page 9 Line 9: “...By used for calculation altitude profile of ...”
